# Supplementary material for: Sex Differences in Fish Oil and Olanzapine Effects on Gut Microbiota in Diet-Induced Obese Mice
Source: MDPI journal article supplement (doi:10.3390/nu14020349), 2022-01-14
Supplement: s1 [file s1]

**Supplemental Table S1: Diet composition**

|                                       | High Fat (HF)<br>D15062102 |             | High Fat-Fish oil (HF-FO)<br>D15062101 |             |
|---------------------------------------|----------------------------|-------------|----------------------------------------|-------------|
| <b>Product #</b>                      | gm%                        | kcal%       | gm%                                    | kcal%       |
| Protein                               | 24.2                       | 20          | 24.2                                   | 20          |
| Carbohydrate                          | 38.2                       | 32          | 38.2                                   | 32          |
| Fat                                   | 26.0                       | 48          | 26.0                                   | 48          |
| Total                                 |                            | 100         |                                        | 100         |
| kcal/gm                               | 4.84                       |             | 4.84                                   |             |
|                                       |                            |             |                                        |             |
| <b>Ingredient</b>                     | gm                         | kcal        | gm                                     | kcal        |
| Casein, 30 mesh                       | 200                        | 800         | 200                                    | 800         |
| L-Cystine                             | 3                          | 12          | 3                                      | 12          |
|                                       |                            |             |                                        |             |
| Corn Starch                           | 38                         | 152         | 38                                     | 152         |
| Maltodextrin 10                       | 100                        | 400         | 100                                    | 400         |
| Sucrose                               | 172.8                      | 691         | 172.8                                  | 691         |
|                                       |                            |             |                                        |             |
| Cellulose                             | 50                         | 0           | 50                                     | 0           |
|                                       |                            |             |                                        |             |
| Soybean Oil                           | 25                         | 225         | 25                                     | 225         |
| Lard                                  | 193                        | 1737        | 144                                    | 1296        |
| Menhaden Oil, Nutegrity               | 0                          | 0           | 49                                     | 441         |
| EPA, Ethyl Ester                      | 0                          | 0           | 0                                      | 0           |
|                                       |                            |             |                                        |             |
| Mineral Mix, S10026                   | 10                         | 0           | 10                                     | 0           |
| DiCalcium Phosphate                   | 13                         | 0           | 13                                     | 0           |
| Calcium Carbonate                     | 5.5                        | 0           | 5.5                                    | 0           |
| Potassium Citrate, 1 H <sub>2</sub> O | 16.5                       | 0           | 16.5                                   | 0           |
|                                       |                            |             |                                        |             |
| Vitamin Mix, V10001                   | 10                         | 40          | 10                                     | 40          |
| Choline Bitartrate                    | 2                          | 0           | 2                                      | 0           |
|                                       |                            |             |                                        |             |
| Vitamin E Acetate, 50% (500 IU/gm)    | 0.13                       | 0           | 0.13                                   | 0           |
|                                       |                            |             |                                        |             |
| FD&C Yellow Dye #5                    | 0.025                      | 0           | 0                                      | 0           |
| FD&C Blue Dye #1                      | 0.025                      | 0           | 0.05                                   | 0           |
|                                       |                            |             |                                        |             |
| <b>Total</b>                          | <b>838.98</b>              | <b>4057</b> | <b>838.98</b>                          | <b>4057</b> |
